# Supplementary material
Source: PubMed Central journal article supplement (PMC4122643)
Supplement: NIHMS571209-supplement-Supp_TableS1.pdf [file NIHMS571209-supplement-Supp_TableS1.pdf]

**Supplementary Online Table 1.** Unadjusted prevalence and age-adjusted and multivariate-adjusted odds ratios for pre-diabetes and undiagnosed and diagnosed diabetes by HCV status (N=15,125 for anti-HCV analysis and 15,036 for HCV RNA analysis.)

| Diabetes status<br>HCV status | Unadjusted<br>prevalence (%) | Age-adjusted |             |         | Multivariate-adjusted |             |         |
|-------------------------------|------------------------------|--------------|-------------|---------|-----------------------|-------------|---------|
|                               |                              | OR*          | 95% CI      | p-value | OR†                   | 95% CI      | p-value |
| <b>Anti-HCV</b>               |                              |              |             |         |                       |             |         |
| Pre-diabetes                  |                              |              |             | 0.52    |                       |             | 0.79    |
| Anti-HCV-                     | 32.7                         | 1.0          |             |         | 1.0                   |             |         |
| Anti-HCV+                     | 36.4                         | 1.12         | 0.79 – 1.61 |         | 1.06                  | 0.68 – 1.65 |         |
| Undiagnosed diabetes          |                              |              |             | 0.70    |                       |             | 0.90    |
| Anti-HCV-                     | 3.2                          | 1.0          |             |         | 1.0                   |             |         |
| Anti-HCV+                     | 3.3                          | 1.15         | 0.56 – 2.37 |         | 1.05                  | 0.45 – 2.48 |         |
| Diagnosed diabetes            |                              |              |             | 0.80    |                       |             | 0.94    |
| Anti-HCV-                     | 7.3                          | 1.0          |             |         | 1.0                   |             |         |
| Anti-HCV+                     | 6.9                          | 1.08         | 0.60 - 1.94 |         | 0.98                  | 0.59 - 1.63 |         |
| <b>HCV RNA</b>                |                              |              |             |         |                       |             |         |
| Pre-diabetes                  |                              |              |             | 0.22    |                       |             | 0.53    |
| HCV RNA-                      | 32.7                         | 1.0          |             |         | 1.0                   |             |         |
| HCV RNA+                      | 39.6                         | 1.27         | 0.86 – 1.87 |         | 1.17                  | 0.72 – 1.89 |         |
| Undiagnosed diabetes          |                              |              |             | 0.47    |                       |             | 0.77    |
| HCV RNA-                      | 3.2                          | 1.0          |             |         | 1.0                   |             |         |
| HCV RNA+                      | 3.9                          | 1.37         | 0.58 – 3.23 |         | 1.16                  | 0.42 – 3.22 |         |
| Diagnosed diabetes            |                              |              |             | 0.54    |                       |             | 0.94    |
| HCV RNA-                      | 7.3                          | 1.0          |             |         | 1.0                   |             |         |
| HCV RNA+                      | 8.1                          | 1.27         | 0.60 - 2.69 |         | 1.02                  | 0.58 - 1.81 |         |

HCV, hepatitis C virus; OR, odds ratio; CI, confidence interval; anti-HCV, HCV antibody.

\*From logistic regression analysis.

†Adjusted for age, sex, race-ethnicity, education, BMI, elevated C-reactive protein, smoking, alcohol use, and blood transfusion before 1992. N=13,630 for anti-HCV analysis and N=13,554 for HCV RNA analysis.
